# Supplementary material for: Randomised controlled trial comparing two group-based exercise programmes (team sport vs circuit training) on men’s health: study protocol
Source: HighWire-hosted journal article supplement (doi:10.1136/bmjsem-2021-001140), 2021-08-01
Supplement: bmjsem-2021-001140supp005_data_supplement.pdf [file bmjsem-2021-001140supp005_data_supplement.pdf]

## A randomised-controlled trial comparing two group-based exercise programs (team-sport vs. circuit training) on men's health – study protocol.

### Additional File 3 – Three example sessions from the 12-week circuit training program

#### Overall session structure

Within each session, exercise selection and order were purposeful. Sessions were designed to include at least:

- 2 resistance stations with movements utilising the whole body
- 2 resistance stations targeting the upper body (1 push and 1 pull movement)
- 2 resistance stations targeting the lower body (1 push and 1 pull movement)
- 2 aerobic stations with movements that were easily progressed or regressed and required minimal to no equipment
- 1 resistance station with a focus on core muscular control

The sequencing of the stations was done in a way to avoid the same body area being worked sequentially, while stations that were not expected to raise heart rate significantly were situated following higher intensity stations (e.g. core muscular control following the aerobic station).

#### Program progression

**Table 1** depicts an overview of the session structure. As can be seen, mirroring that of the team-sport group, session intensity is initially increased through progressing the prescribed rating of perceived exertion (RPE). From week 5 onwards, participants were instructed to exercise at an intensity that they felt challenging but that they felt comfortable with (as is done in the team-sport group). Further progression is achieved in weeks 5 to 6 through reducing the rest interval, while also incorporating two more exercising stations to maintain similar total session duration. The final change in rest interval occurs from week 7 and is held throughout the remainder of the program. From week 7 an additional station is also added to combat the decreased rest interval, to maintain session duration. Exercises are progressed in difficulty throughout the program.

#### Example sessions

**Table 2, 3 and 4** are example sessions from the program.

Table 1 – overview of 12-week circuit training program

| Week   | Repetitions | Rest       | Intensity   | Number of stations                                     |
|--------|-------------|------------|-------------|--------------------------------------------------------|
| 1 – 4  | 30 seconds  | 45 seconds | Wk 1 RPE 11 | 9 (as outlined above)                                  |
|        |             |            | Wk 2 RPE 12 |                                                        |
|        |             |            | Wk 3 RPE 13 |                                                        |
|        |             |            | Wk 4 RPE 14 |                                                        |
| 5 – 6  | 30 seconds  | 35 seconds | RPE 14+     | 12 (above + 1 x whole body, aerobic, and core station) |
| 7 – 12 | 30 seconds  | 30 seconds | RPE 14+     | 13 (above + 1 core station)                            |

RPE; rating of perceived exertion (6-20 scale).

Table 2 – example session – week #2 (note rest interval and intensity)

| Type                                       | Exercise            | Reps | Rest | Intensity | Equipment             |
|--------------------------------------------|---------------------|------|------|-----------|-----------------------|
| WB                                         | Battle ropes        | 30s  | 45s  | 12        | Battle Rope           |
| LB                                         | Lunge (stationary)  | 30s  | 45s  | 12        | Kettlebell            |
| UB                                         | Upright row         | 30s  | 45s  | 12        | Sandbag or Kettlebell |
| AT                                         | High knees          | 30s  | 45s  | 12        |                       |
| Core                                       | Deadbug             | 30s  | 45s  | 12        | Mat                   |
| WB                                         | Weighted slow walk  | 30s  | 45s  | 12        | Sandbag               |
| LB                                         | Good Morning        | 30s  | 45s  | 12        | Sandbag or Kettlebell |
| AT                                         | Light jog           | 30s  | 45s  | 12        |                       |
| UB                                         | 2 Hand Banded Press | 30s  | 45s  | 12        | Resistance Band       |
| Repeat 3 times (3.5 min rest between sets) |                     |      |      |           |                       |

Mr. Henry Blake – Alliance for Research in Exercise, Nutrition and Activity (ARENA), UniSA Allied Health and Human Performance, University of South Australia

A randomised-controlled trial comparing two group-based exercise programs (team-sport vs. circuit training) on men's health – study protocol.

Table 3 – example session – week 6 (note rest interval decrease, change in RPE intensity and additional stations)

| Type                                       | Exercise               | Reps | Rest | Intensity | Equipment             |
|--------------------------------------------|------------------------|------|------|-----------|-----------------------|
| WB                                         | Rope pull              | 30s  | 35s  | 14+       | Battle Rope           |
| LB                                         | Stationary lunge       | 30s  | 35s  | 14+       | Sandbag or Kettlebell |
| UB                                         | Split Squat banded row | 30s  | 35s  | 14+       | Heavy resistance band |
| AT                                         | High Knees             | 30s  | 35s  | 14+       |                       |
| Core                                       | Banded wood chop       | 30s  | 35s  | 14+       | Resistance band       |
| WB                                         | Suitcase carry         | 30s  | 35s  | 14+       | Sandbag               |
| LB                                         | Deadlift               | 30s  | 35s  | 14+       | Kettlebell            |
| AT                                         | 10m shuttles           | 30s  | 35s  | 14+       |                       |
| UB                                         | Tricep dip             | 30s  | 35s  | 14+       | Bench                 |
| WB                                         | Push press             | 30s  | 35s  | 14+       | Sandbag               |
| Core                                       | Prone plank            | 30s  | 35s  | 14+       | Mat                   |
| AT                                         | Star Jumps             | 30s  | 35s  | 14+       |                       |
| Repeat 3 times (3.5 min rest between sets) |                        |      |      |           |                       |

Table 4 – example session – week 10 (note rest interval decrease, additional core control station and exercise progressions (e.g. progression from deadlift in week 6 to kettlebell swing in week 10))

| Type                                       | Exercise                       | Reps | Rest | Intensity | Equipment             |
|--------------------------------------------|--------------------------------|------|------|-----------|-----------------------|
| WB                                         | Romanian deadlift to high pull | 30s  | 30s  | 14+       | Sandbag               |
| LB                                         | Walking lunge                  | 30s  | 30s  | 14+       | Sandbag or Kettlebell |
| UB                                         | Bent over row                  | 30s  | 30s  | 14+       | Sandbag or Kettlebell |
| AT                                         | Seal jumps                     | 30s  | 30s  | 14+       |                       |
| Core                                       | Prone plank                    | 30s  | 30s  | 14+       | Mat                   |
| WB                                         | Squat press                    | 30s  | 30s  | 14+       | Sandbag               |
| LB                                         | Kettlebell swing               | 30s  | 30s  | 14+       | Kettlebell            |
| AT                                         | 10m shuttles                   | 30s  | 30s  | 14+       |                       |
| Core                                       | Deadbug (double)               | 30s  | 30s  | 14+       | Mat                   |
| UB                                         | Push up                        | 30s  | 30s  | 14+       | Mat                   |
| WB                                         | Push press                     | 30s  | 30s  | 14+       | Sandbag               |
| Core                                       | Banded wood chop               | 30s  | 30s  | 14+       | Resistance band       |
| AT                                         | Star Jumps                     | 30s  | 30s  | 14+       |                       |
| Repeat 3 times (3.5 min rest between sets) |                                |      |      |           |                       |

Mr. Henry Blake – Alliance for Research in Exercise, Nutrition and Activity (ARENA), UniSA Allied Health and Human Performance, University of South Australia
